# Supplementary material for: Heat Shock Protein 70 Family in Response to Multiple Abiotic Stresses in the Silkworm
Source: MDPI journal article supplement (doi:10.3390/insects12100928), 2021-10-12
Supplement: s1 [file s1]

**Table S2.** Primers of the silkworm HSP70 genes used for RT-PCR and qPCR detection.

| Gene           | Primer sequence (5' to 3')                              | Amplification length (bp) | Annealing temperature (°C) |
|----------------|---------------------------------------------------------|---------------------------|----------------------------|
| <i>HSP70-1</i> | F: AAAGCCCAAAATCCAGATAGA<br>R: TACGAAGCACATTCAGACCAG    | 218                       | 53                         |
| <i>HSP70-2</i> | F: CACTGTCTGAAGAAGTTGATTGA<br>R: CATTTGTATAAAGGTGGGGAGA | 112                       | 53                         |
| <i>HSP70-3</i> | F: AGTGATGGACCCACAGTTGAG<br>R: GTATTCACGGGCTGCTACAA     | 174                       | 53                         |
| <i>HSP70-4</i> | F: GTCATTCTGGTCGGAGGTAG<br>R: GACAGGGTATAGATGTATTTTCGT  | 265                       | 55                         |
| <i>HSC70-1</i> | F: GGCTCTACCCGTATCCCTAA<br>R: TCACTCCACCGACAGTTTCA      | 208                       | 53                         |
| <i>HSC70-2</i> | F: AAGACTTTGATAGCCGAATG<br>R: AGCCCTTGACAGTTTAGAATAG    | 209                       | 51                         |
| <i>HSC70-3</i> | F: CGGAATACATTTGGGTAACA<br>R: ATCACAGTTCATTAGCCGTT      | 208                       | 53                         |
| <i>HSC70-4</i> | F: CAGGTCCACTCCGTCTTATGT<br>R: CTTAGGTTTGCCTCCGTCCT     | 202                       | 55                         |
| <i>HSC70-5</i> | F: AGACGCTATGGCTATGCA<br>R: GGACCTTAGGCATTCTC           | 287                       | 51                         |
| <i>Actin3</i>  | F: TTTATTCTGAGCGTAAGTGG<br>R: TAATGCTGGAACCTCGTAATG     | 205                       | 51                         |

Note: The GenBank accession number of *Actin3* gene is U49854.1. F: forward primer sequence; R: reverse primer sequence.
